# Supplementary material
Source: HighWire-hosted journal article supplement (doi:10.1101/rna.080031.124)
Supplement: Supplemental_Table_S1.xlsx [file Supplemental_Table_S1.xlsx]

## Sheet: Sheet1
Full sequence of read	Upstream (rDNA-mapping) sequence	Upstream sequence coordinates	Inserted sequence	Downstream (transgene-mapping) sequence	Downstream sequence coordinates
AGCAGCCGACTTAGAACTGGTGCGGACCAGGGGAATCCGACTGTTTAATTAAAACAAAGCATCGCGAAGGCCCGCGGCGGGTGTTGACGCGATGTGGGGGTAAACGGCCGGCATGGTCCCAGCCTCCTCGCTGGCGCCGGCTGGGCAACAT	AGCAGCCGACTTAGAACTGGTGCGGACCAGGGGAATCCGACTGTTTAATTAAAACAAAGCATCGCGAAGGCCCGCGGCGGGTGTTGACGCGATGTG	rDNA reference: 11498–11593	G	GGGTAAACGGCCGGCATGGTCCCAGCCTCCTCGCTGGCGCCGGCTGGGCAACAT	Transgene reference: -8–46
GCCCAGTGCTCTGAATGTCAAAGTGAAGAAATTCAATGAAGCGCGGGTAAACGGCGGGAGTAACTATGACTCTCTTAAGAGGGTAAACGGCCGGCATGGTCCCAGCCTCCTCGCTGGCGCCGGCTGGGCAACATTCCGAGGGGACCGTCCC	GCCCAGTGCTCTGAATGTCAAAGTGAAGAAATTCAATGAAGCGCGGGTAAACGGCGGGAGTAACTATGACTCTCTTAAG	rDNA reference: 11600–11678	A	GGGTAAACGGCCGGCATGGTCCCAGCCTCCTCGCTGGCGCCGGCTGGGCAACATTCCGAGGGGACCGTCCC	Transgene reference: -8–63
GACGTCGCTATGAACGCTTGGCCGCCACAAGCCAGTTATCCCTGTGGTAACTTTTCTGACACCTCCTGCAGGGTAAACGGCCGGCATGGTCCCAGCCTCCTCGCTGGCGCCGGCTGGGCAACATTCCGAGGGGACCGTCCCCTCGGTAATG	GACGTCGCTATGAACGCTTGGCCGCCACAAGCCAGTTATCCCTGTGGTAACTTTTCTGACACCTCCTGC	rDNA reference: 12266–12334	A	GGGTAAACGGCCGGCATGGTCCCAGCCTCCTCGCTGGCGCCGGCTGGGCAACATTCCGAGGGGACCGTCCCCTCGGTAATG	Transgene reference: -8–73
AAGCGCGGGTAAACGGCGGGAGTAACTATGACTCTCTTAAAGGCGGGTAAACGGCCGGCATGGTCCCAGCCTCCTCGCTGGCGCCGGCTGGGCAACATTCCGAGGGGACCGTCCCCTCGGTAATGGCGAATGGGACCCCGGACTTGTCATG	AAGCGCGGGTAAACGGCGGGAGTAACTATGACTCTCTTAA	rDNA reference: 11638–11677	AGGC	GGGTAAACGGCCGGCATGGTCCCAGCCTCCTCGCTGGCGCCGGCTGGGCAACATTCCGAGGGGACCGTCCCCTCGGTAATGGCGAATGGGACCCCGGACTTGTCATG	Transgene reference: -8–99
AATTCAATGAAGCGCGGGTAAACGGCGGGAGTAACTATGACTCTCTTAACTATGTAAACGGCCGGCATGGTCCCAGCCTCCTCGCTGGCGCCGGCTGGGCAACATTCCGAGGGGACCGTCCCCTCGGTAATGGCGAATGGGACCCCGGACT	AATTCAATGAAGCGCGGGTAAACGGCGGGAGTAACTATGACTCTCTTAA	rDNA reference: 11629–11677	CTAT	GTAAACGGCCGGCATGGTCCCAGCCTCCTCGCTGGCGCCGGCTGGGCAACATTCCGAGGGGACCGTCCCCTCGGTAATGGCGAATGGGACCCCGGACT	Transgene reference: -6–92
GTAAACGGCGGGAGTAACTATGACTCTCTTAATTTGGCCGTTTACCCAAACGGCCGGCATGGTCCCAGCCTCCTCGCTGGCGCCGGCTGGGCAACATTCCGAGGGGACCGTCCCCTCGGTAATGGCGAATGGGACCCCGGACTTGTCATGA	GTAAACGGCGGGAGTAACTATGACTCTCTTAA	rDNA reference: 11646–11677	TTTGGCCGTTTACCC	AAACGGCCGGCATGGTCCCAGCCTCCTCGCTGGCGCCGGCTGGGCAACATTCCGAGGGGACCGTCCCCTCGGTAATGGCGAATGGGACCCCGGACTTGTCATGA	Transgene reference: -4–100
CAAAGTGAAGAAATTCAATGAAGCGCGGGTAAACGGCGGGAGTAACTATGACTCTCTTAAGGTTGGCCGGCATGGTCCCAGCCTCCTCGCTGGCGCCGG	CAAAGTGAAGAAATTCAATGAAGCGCGGGTAAACGGCGGGAGTAACTATGACTCTCTTAAGGT	rDNA reference: 11618–11680	T	GGCCGGCATGGTCCCAGCCTCCTCGCTGGCGCCGG	Transgene reference: 1–35
AATCCGACTGTTTAATTAAAACAAAGCATCGCGAAGGCCCGCGGCGGGTGTTGACGCGATGTGATTTCTGCCCAGTGCTCTGAATGTCAAAGTGAAGAAATTCAATGAAGAGGCCGGCATGGTCCCAGCCTCCTCGCTGGCGCCGGCTGGG	AATCCGACTGTTTAATTAAAACAAAGCATCGCGAAGGCCCGCGGCGGGTGTTGACGCGATGTGATTTCTGCCCAGTGCTCTGAATGTCAAAGTGAAGAAATTCAATGAAG	rDNA reference: 11531–11640	A	GGCCGGCATGGTCCCAGCCTCCTCGCTGGCGCCGGCTGGG	Transgene reference: 1–40
GAAATTCAATGAAGCGCGGGTAAACGGCGGGAGTAACTATGACTCTCTTAAGGTTGGCCGGCATGGTCCCAGCCTCCTCGCTGGCGCCGGCTGGGC	GAAATTCAATGAAGCGCGGGTAAACGGCGGGAGTAACTATGACTCTCTTAAGGT	rDNA reference: 11627–11680	T	GGCCGGCATGGTCCCAGCCTCCTCGCTGGCGCCGGCTGGGC	Transgene reference: 1–41
CGGGTGTTGACGCGATGTGATTTCTGCCCAGTGCTCTGAATGTCAAAGTGAAGAAATTCAATGAAGCGCGGGTAAACGGCGGGAGTAACTATGACTCTCAAAATGGCCGGCATGGTCCCAGCCTCCTCGCTGGCGCCGGCTGGGCAACATT	CGGGTGTTGACGCGATGTGATTTCTGCCCAGTGCTCTGAATGTCAAAGTGAAGAAATTCAATGAAGCGCGGGTAAACGGCGGGAGTAACTATGACTCTC	rDNA reference: 11575–11673	AAAAT	GGCCGGCATGGTCCCAGCCTCCTCGCTGGCGCCGGCTGGGCAACATT	Transgene reference: 1–47
GGCGGGTGTTGACGCGATGTGATTTCTGCCCAGTGCTCTGAATGTCAAAGTGAAGAAATTCAATGAAGCGCGGGTAAACGGCGGGAGTAACTATGACTCATGGCCGGCATGGTCCCAGCCTCCTCGCTGGCGCCGGCTGGGCAACATTCCG	GGCGGGTGTTGACGCGATGTGATTTCTGCCCAGTGCTCTGAATGTCAAAGTGAAGAAATTCAATGAAGCGCGGGTAAACGGCGGGAGTAACTATGACTC	rDNA reference: 11573–11671	AT	GGCCGGCATGGTCCCAGCCTCCTCGCTGGCGCCGGCTGGGCAACATTCCG	Transgene reference: 1–50
GAAAAGTTACCACAGGGATAACTGGCTTGTGGCGGCCAAGCGTTCATAGCGACGTCGCGGGACCCCGGACTTGTCATGATCTCCCAGTGGCCGGCATGGTCCCAGCCTCCTCGCTGGCGCCGGCTGGGCAACATTCCGAGGGGACCGTCC	GAAAAGTTACCACAGGGATAACTGGCTTGTGGCGGCCAAGCGTTCATAGCGACGTCGC	rDNA reference: 12279–12336	GGGACCCCGGACTTGTCATGATCTCCCAGT	GGCCGGCATGGTCCCAGCCTCCTCGCTGGCGCCGGCTGGGCAACATTCCGAGGGGACCGTCC	Transgene reference: 1–62
TCTGCCCAGTGCTCTGAATGTCAAAGTGAAGAAATTCAATGAAGCGCGGGTAAACGGCGGGAGTAACTATGACTCTCTTAAGAGTCATTGGCCGGCATGGTCCCAGCCTCCTCGCTGGCGCCGGCTGGGCAACATTCCGAGGGGACCGTCC	TCTGCCCAGTGCTCTGAATGTCAAAGTGAAGAAATTCAATGAAGCGCGGGTAAACGGCGGGAGTAACTATGACTCTCTTAAG	rDNA reference: 11597–11678	AGTCATT	GGCCGGCATGGTCCCAGCCTCCTCGCTGGCGCCGGCTGGGCAACATTCCGAGGGGACCGTCC	Transgene reference: 1–62
TGAATGTCAAAGTGAAGAAATTCAATGAAGCGCGGGTAAACGGCGGGAGTAACTATGACTCTCTTAAGGATTTGGCCGGCATGGTCCCAGCCTCCTCGCTGGCGCCGGCTGGGCAACATTCCGAGGGGACCGTCCCCTCGGTAATGGCGAA	TGAATGTCAAAGTGAAGAAATTCAATGAAGCGCGGGTAAACGGCGGGAGTAACTATGACTCTCTTAAGG	rDNA reference: 11611–11679	ATTT	GGCCGGCATGGTCCCAGCCTCCTCGCTGGCGCCGGCTGGGCAACATTCCGAGGGGACCGTCCCCTCGGTAATGGCGAA	Transgene reference: 1–78
AGCGCCAGGGTCCCCACGAACGTGCGGTGCGTGACGGGCGAGGGGGCGGCCGCCTTTCCGGCATGTTGGCCGGCATGGTCCCAGCCTCCTCGCTGGCGCCGGCTGGGCAACATTCCGAGGGGACCGTCCCCTCGGTAATGGCGAATGGG	AGCGCCAGGGTCCCCACGAACGTGCGGTGCGTGACGGGCGAGGGGGCGGCCGCCTTTCC	rDNA reference: 12808–12866	GGCATGTT	GGCCGGCATGGTCCCAGCCTCCTCGCTGGCGCCGGCTGGGCAACATTCCGAGGGGACCGTCCCCTCGGTAATGGCGAATGGG	Transgene reference: 1–82
GTTTCTGTCCTCCCTGAGCTCGCCTTAGGACACCTGCGTTACCGTTTGACAGGTGTCCTAATATTTGGCCGGCATGGTCCCAGCCTCCTCGCTGGCGCCGGCTGGGCAACATTCCGAGGGGACCGTCCCCTCGGTAATGGCGAATGGGACC	GTTTCTGTCCTCCCTGAGCTCGCCTTAGGACACCTGCGTTACCGTTTGACAGGTGT	rDNA reference: 12105–12160	CCTAATATTT	GGCCGGCATGGTCCCAGCCTCCTCGCTGGCGCCGGCTGGGCAACATTCCGAGGGGACCGTCCCCTCGGTAATGGCGAATGGGACC	Transgene reference: 1–85
CGCGCGGGCCCCGGTGGGGCGGCCACCCGGGGTCCCGGCCCTCGCGCGTCTATTTTGGCCGGCATGGTCCCAGCCTCCTCGCTGGCGCCGGCTGGGCAACATTCCGAGGGGACCGTCCCCTCGGTAATGGCGAATGGGACCCCGGACTTG	CGCGCGGGCCCCGGTGGGGCGGCCACCCGGGGTCCCGGCCCTCGCGCGTC	rDNA reference: 13287–13336	TATTTT	GGCCGGCATGGTCCCAGCCTCCTCGCTGGCGCCGGCTGGGCAACATTCCGAGGGGACCGTCCCCTCGGTAATGGCGAATGGGACCCCGGACTTG	Transgene reference: 1–94
GAAATTCAATGAAGCGCGGGTAAACGGCGGGAGTAACTATGACTCTCTTAAGGTTGGCCGGCATGGTCCCAGCCTCCTCGCTGGCGCCGGCTGGGCAACATTCCGAGGGGACCGTCCCCTCGGTAATGGCGAATGGGACCCCGGACTTGTC	GAAATTCAATGAAGCGCGGGTAAACGGCGGGAGTAACTATGACTCTCTTAAGGT	rDNA reference: 11627–11680	T	GGCCGGCATGGTCCCAGCCTCCTCGCTGGCGCCGGCTGGGCAACATTCCGAGGGGACCGTCCCCTCGGTAATGGCGAATGGGACCCCGGACTTGTC	Transgene reference: 1–96
TTGACTCTAGTCTGGCACGGTGAAGAGACATGAGAGGTGTAGAATAAGATGGCCGGAATGGTCCCAGCCTCCTCGCTGGCGCCGGCTGGGCAACATTCCGAGGGGACCGTCCCCTCGGTAATGGCGAATGGGACCCCGGACTTGTCATGAT	TTGACTCTAGTCTGGCACGGTGAAGAGACATGAGAGGTGTAGAATAAG	rDNA reference: 11822–11869	AT	GGCCGGAATGGTCCCAGCCTCCTCGCTGGCGCCGGCTGGGCAACATTCCGAGGGGACCGTCCCCTCGGTAATGGCGAATGGGACCCCGGACTTGTCATGAT	Transgene reference: 1–101
TCATCCATTCATGCGCGTCACTAATTAGATGACGAGGCATTAGGCCGGCATGGTCCCAGCCTCCTCGCTGGCGCCGGCTGGGCAACATTCCGAGGGGACCGTCCCCTCGGTAATGGCGAATGGGACCCCGGACTTGTCATGATCTCCCAG	TCATCCATTCATGCGCGTCACTAATTAGATGACGAGGCATT	rDNA reference: 11686–11726	A	GGCCGGCATGGTCCCAGCCTCCTCGCTGGCGCCGGCTGGGCAACATTCCGAGGGGACCGTCCCCTCGGTAATGGCGAATGGGACCCCGGACTTGTCATGATCTCCCAG	Transgene reference: 1–108
AACTATGACTCTCTTAAATGGCCGGCATGGTCCCAGCCTCCTCGCTGGCGCCGGCTGGGCAACATTCCGAGGGGACCGTCCCCTCGGTAATGGCGAATGGGACCCCGGACTTGTCATGATCTCCCAGACTTGTCCAAGGTGGACGGGCCAC	AACTATGACTCTCTTAA	rDNA reference: 11661–11677	AT	GGCCGGCATGGTCCCAGCCTCCTCGCTGGCGCCGGCTGGGCAACATTCCGAGGGGACCGTCCCCTCGGTAATGGCGAATGGGACCCCGGACTTGTCATGATCTCCCAGACTTGTCCAAGGTGGACGGGCCAC	Transgene reference: 1–132
AAGAAATTCAATGAAGCGCGGGTAAACGGCGGGAGTAACTATGACTCTCTTAAGGTATGCCTTAAGACCCAGCCGGCATGGTCCCAGCCTCCTCGCTGGCGCCGGCTGGGCAACATTCCGAGGGGACCGTCCCCTCGGTAATGGCGAATG	AAGAAATTCAATGAAGCGCGGGTAAACGGCGGGAGTAACTATGACTCTCTTAAGGTA	rDNA reference: 11625–11681	TGCCTTAAGACCCA	GCCGGCATGGTCCCAGCCTCCTCGCTGGCGCCGGCTGGGCAACATTCCGAGGGGACCGTCCCCTCGGTAATGGCGAATG	Transgene reference: 2–80
AAAGTGAAGAAATTCAATGAAGCGCGGGTAAACGGCGGGAGTAACTCTCTTAGTCCGGCATGGTCCCAGCCTCCTCGCTGGCGCCGGCTGGGCAACATTCCGAGGGGACCGTCCCCTCGGTAATGGCGAATGGGACCCCGGACTTGTC	AAAGTGAAGAAATTCAATGAAGCGCGGGTAAACGGCGGGAGTAACT	rDNA reference: 11619–11664	CTCTTAGT	CCGGCATGGTCCCAGCCTCCTCGCTGGCGCCGGCTGGGCAACATTCCGAGGGGACCGTCCCCTCGGTAATGGCGAATGGGACCCCGGACTTGTC	Transgene reference: 3–96
GAATACAGACCGTGAAAGCGGGGCCTCACGATCCTTCTGACCTTGGCTGGGAAGGCCCGGCGGGGAAGGTGGCTCGGGGGGCCCCGTCCGTCCGTCCGTCCACATGGTCCCAGCCTCCTCGCTGGCGCCGGCTGGGCAACATTCCGAGGGG	GGCTGGGAAGGCCCGGCGGGGAAGGTGGCTCGGGGGGCCCCGTCCGTCCGTCCGTCC	rDNA reference: 8645–8701	A	CATGGTCCCAGCCTCCTCGCTGGCGCCGGCTGGGCAACATTCCGAGGGG	Transgene reference: 7–55
GCGCGGGTAAACGGCGGGAGTAACTATGACTCTCTTAAGAGAGTAATACGGCCCAATGGTCCCAGCCTCCTCGCTGGCGCCGGCTGGGCAACATTCCGAGGGGACCGTCCCCTCGGTAATGGCGAATGGGACCCCGGACTTGTCATGATCT	GCGCGGGTAAACGGCGGGAGTAACTATGACTCTCTTAAG	rDNA reference: 11640–11678	AGAGTAATACGGCCCA	ATGGTCCCAGCCTCCTCGCTGGCGCCGGCTGGGCAACATTCCGAGGGGACCGTCCCCTCGGTAATGGCGAATGGGACCCCGGACTTGTCATGATCT	Transgene reference: 8–103
GTAAACGGCGGGAGTAACTATGACTCTCTTAAGGTAGCCAAATGGTAAGGGGACGGTCCTTAACTATGACCTCGCTGGCGCCGGCTGGGCAACATTCCGAGGGGACCGTCCCCTCGGTAATGGCGAATGGGACCCCGGACTTGTCATGATC	GTAAACGGCGGGAGTAACTATGACTCTCTTAAGGTAGCCAAATG	rDNA reference: 11646–11689	GTAAGGGGACGGTCCTTAACTATGA	CCTCGCTGGCGCCGGCTGGGCAACATTCCGAGGGGACCGTCCCCTCGGTAATGGCGAATGGGACCCCGGACTTGTCATGATC	Transgene reference: 21–102
TCAAAGTGAAGAAATTCAATGAAGCGCGGGTAAACGGCGGGAGTAACTATGACTCTCTTAAGGAACTATGACTCTCTTAGTCTCTTAGCCAAATGCCAGCCTCGCTGGCGCCGGCTGGGCAACATTCCGAGGGG	TCAAAGTGAAGAAATTCAATGAAGCGCGGGTAAACGGCGGGAGTAACTATGACTCTCTTAAGG	rDNA reference: 11617–11679	AACTATGACTCTCTTAGTCTCTTAGCCAAATGCCAG	CCTCGCTGGCGCCGGCTGGGCAACATTCCGAGGGG	Transgene reference: 21–55
CGGGTGTTGACGCGATGTGATTTCTGCCCAGTGCTCTGAATGTCAAAGTGAAGAAATTCAATGAAGCGCGGGTAAACGGCGGGAGTAACTATGACTCGGAATGTTGCCTCGCTGGCGCCGGCTGGGCAACATTCCGAGGGGACCGTCCCCT	CGGGTGTTGACGCGATGTGATTTCTGCCCAGTGCTCTGAATGTCAAAGTGAAGAAATTCAATGAAGCGCGGGTAAACGGCGGGAGTAACTATGACTC	rDNA reference: 11575–11671	GGAATGTTG	CCTCGCTGGCGCCGGCTGGGCAACATTCCGAGGGGACCGTCCCCT	Transgene reference: 21–65
GCCCAGTGCTCTGAATGTCAAAGTGAAGAAATTCAATGAAGCGCGGGTAAACGGCGGGAGTAACTATGACTCTCTTAAGATGCTCGCTGGCGCCGGCTGGGCAACATTCCGAGGGGACCGTCCCCTCGGTAATGGCGAATGGGACCCCGG	GCCCAGTGCTCTGAATGTCAAAGTGAAGAAATTCAATGAAGCGCGGGTAAACGGCGGGAGTAACTATGACTCTCTTAAG	rDNA reference: 11600–11678	ATG	CTCGCTGGCGCCGGCTGGGCAACATTCCGAGGGGACCGTCCCCTCGGTAATGGCGAATGGGACCCCGG	Transgene reference: 22–89
AAATTCAATGAAGCGCGGGTAAACGGCGGGAGTAACTATGACTCTCTTACCGGCCTTAAACGATGGCGCCGGCTGGGCAACATTCCGAGGGGACCGTCCCCTCGGTAATGGCGAATGGGACCCCGGACTTGTCATGATCTCCCAGACTTGT	AAATTCAATGAAGCGCGGGTAAACGGCGGGAGTAACTATGACTCTCTTA	rDNA reference: 11628–11676	CCGGCCTTAAACGA	TGGCGCCGGCTGGGCAACATTCCGAGGGGACCGTCCCCTCGGTAATGGCGAATGGGACCCCGGACTTGTCATGATCTCCCAGACTTGT	Transgene reference: 27–114
GAAGCGCGGGTAAACGGCGGGAGTAACTATGACTCTCTTAATTTGCCGGCTGGGCAACATTCCGAGGGGACCGTCCCCTCGGTAATGGCGAATGGGACCCC	GAAGCGCGGGTAAACGGCGGGAGTAACTATGACTCTCTTAA	rDNA reference: 11637–11677	TTT	GCCGGCTGGGCAACATTCCGAGGGGACCGTCCCCTCGGTAATGGCGAATGGGACCCC	Transgene reference: 31–87
CGCCCCCCCGCCTCACCGGGTCAGTGAAAAAACGATCAGAGTAGTGGTATTTCACCGGCGGCCCGCAGGGGACATGGCGAATGGGACCCCGGACTTGTCATGATCTCCCAGACTTGTCCAAGGTGGACGGGCCACCTTTACTTAACCCGGA	CGCCCCCCCGCCTCACCGGGTCAGTGAAAAAACGATCAGAGTAGTGGTATTTCACCGGCGGCCCGCAGGG	rDNA reference: 11930–11999	GAC	ATGGCGAATGGGACCCCGGACTTGTCATGATCTCCCAGACTTGTCCAAGGTGGACGGGCCACCTTTACTTAACCCGGA	Transgene reference: 71–148
TCGCGAAGGCCCGCGGCGGGTGTTGACGCGATGTGATTTCTGCCCAGTGCTCTGAATGTCAAAGTGAAGAAATTCAATGAAGCGCGGGTAAACGGCGGGAGTAACTATGACTCTCTTTGGGACGGGCCACCTTTACTTAACCCGGAAAAGG	TCGCGAAGGCCCGCGGCGGGTGTTGACGCGATGTGATTTCTGCCCAGTGCTCTGAATGTCAAAGTGAAGAAATTCAATGAAGCGCGGGTAAACGGCGGGAGTAACTATGACTCTCTT	rDNA reference: 11559–11675	TG	GGACGGGCCACCTTTACTTAACCCGGAAAAGG	Transgene reference: 122–153
